# Supplementary material for: An electrostatic duel: subtle differences in the catalytic performance of monoamine oxidase A and B isoenzymes elucidated at the residue level using quantum computations
Source: Royal Society of Chemistry journal article supplement (doi:10.1039/d1cp03993h), 2021-01-01
Supplement: d1cp03993h1.pdf [file d1cp03993h1.pdf]

## Supporting Information

### An electrostatic duel: subtle differences in catalytic performance of monoamine oxidase A and B isoenzymes elucidated at a residue level by quantum computations

Alja Prah,<sup>†,‡</sup> Janez Mavri<sup>†</sup> and Jernej Stare<sup>\*,†</sup>

<sup>†</sup>Theory Department, National Institute of Chemistry, 1001 Ljubljana, Slovenia

<sup>‡</sup>Faculty of Pharmacy, University of Ljubljana, 1000 Ljubljana, Slovenia

\*jernej.stare@ki.si

**S1. Scheme of the rate-limiting step for the reaction between phenylethylamine (PEA) and the truncated monoamine oxidase (MAO) cofactor, lumiflavin (LFN).** The reaction was modeled based on the presumed hydride transfer mechanism. More details about the reaction and its mechanism can be found in our previous work.<sup>1-4</sup>

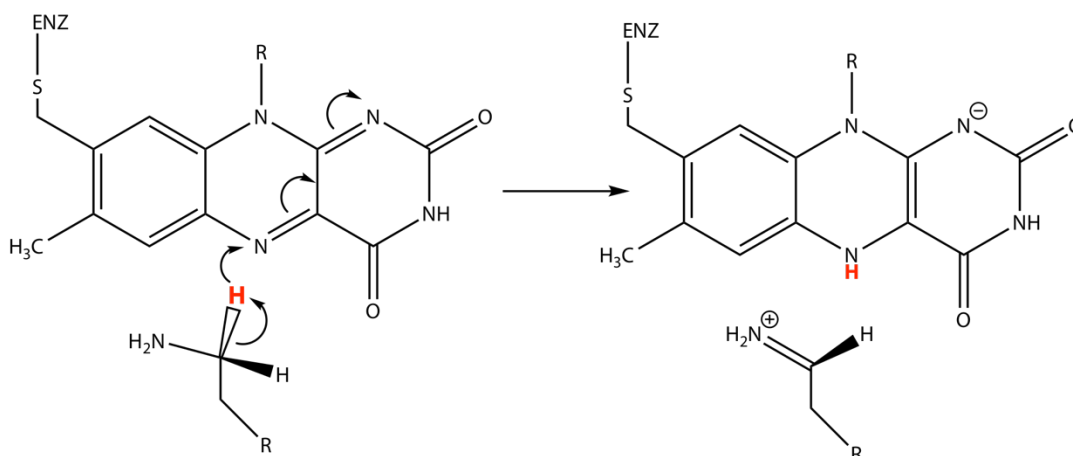

#### S2. Details on simulation of reactions.

Representative geometries of our system were derived from preceding molecular dynamics simulations of the rate-limiting step of PEA oxidation by the monoamine oxidase enzyme. For the MAO A isoenzyme, the simulation details were published in our previous work.<sup>2</sup> The simulations were based on crystallographic structures of both MAO enzymes, deposited in the Protein Data Bank (ID code 2Z5X for MAO A and 1GOS for MAO B). We used the OPLS-AA force field<sup>5-7</sup> for the description of our system, which was enclosed by a spherical simulation cell (30 Å radius, centered on the reacting N atom of the flavin cofactor), encompassing the enzyme with a manually docked PEA molecule and roughly 1900 water molecules. Both systems were primarily relaxed in 10 distinctive steps, where the temperature was slowly raised from 1 K to 300 K, the timestep was gradually increased from 0.1 fs to 1 fs and the restraints on the reactive subsystem were slowly relaxed. It is important to note that special care was taken in order to dock the PEA molecule as similarly as possible into both active sites (i.e., achieve a similar relative position of PEA to the flavin cofactor), so as to minimize the variation between the isoenzymes.

The simulation of the reaction was based on the Free Energy Perturbation/Umbrella Sampling approach,<sup>8-9</sup> along with the Empirical Valence Bond (EVB) protocol<sup>10-12</sup> in order to calculate the

pertinent free energy profiles. The force field of the reactants was linearly transformed into the force field of the products in 51 steps *via* the following equation:

$$H(\lambda) = \lambda \cdot H_R + (1 - \lambda) \cdot H_P,$$

where the coupling parameter  $\lambda$  was varied from 1 (reactants) to 0 (products). For both isoenzymes, 10 independent replicas were generated, all with 51  $\lambda$ -steps of 10 ps. The EVB methodology was used to generate free energy profiles and calculate the average free energy barrier for both isoenzymes. As is common with the EVB protocol, the free energy profiles for the reaction in the enzyme were generated by using parameters derived from gas phase simulations of the reaction between PEA and LFN, described in our previous work.<sup>13</sup>

The calculated difference of 1.27 kcal/mol between the barriers of both isoenzymes was in excellent agreement with the experimentally determined difference of 1.28 kcal/mol. All simulations and free-energy calculations were performed with the Q5 software package.<sup>14</sup>

Structures of our system corresponding to the state of reactants and the transition state were identified from the free energy profiles and extracted from the molecular dynamics trajectories.

### S3. Details on evaluation of the effect of electrostatic environment.

The first value we calculated was the energy barrier difference, which is determined by the following equation:

$$\Delta E = E_{OFF} - E_{ON} = (\langle E_{OFF}^{TS} \rangle_{snapshots} - \langle E_{OFF}^R \rangle_{snapshots}) - (\langle E_{ON}^{TS} \rangle_{snapshots} - \langle E_{ON}^R \rangle_{snapshots}),$$

where  $E_{OFF}$  is the energy difference between the transition state (TS) and the state of reactants (R) when the charges are turned "OFF" (i.e., not present) and  $E_{ON}$  is the energy difference between the transition state (TS) and the state of reactants (R) when the charges are turned "ON" (i.e., present). All values were averaged over 100 snapshots.

For both isoenzymes, the inclusion of the electrostatic environment (charges "ON") results in a lower energy barrier compared to the state with charges "OFF". This barrier lowering effect amounts to 14.22 kcal/mol in the MAO A enzyme and 17.54 kcal/mol in MAO B, which means that the inclusion of the electrostatic environment lowers the barrier by 3.32 kcal/mol more in the MAO B isoenzyme. This is in fairly good agreement with the experimental values reported, where the free energy barrier for this reaction is 1.28 kcal/mol lower in the MAO B isoenzyme than in MAO A.<sup>15</sup>

In a similar manner to the calculated energy barrier difference, the influence of the electrostatic environment on the charge transfer between the two reacting moieties during the transition from R to TS was determined using the Natural Bond Orbital method. The charge transfer is defined as the difference between the sum of the atomic charges of all PEA atoms in the transition state and in the reactant state. The value given in Table 1 represents the increase in charge transfer when the electrostatic environment is included – i.e., in the state with the charges ON the amount of charge transferred is increased in both isoenzymes by 0.156 and 0.184 a. u., respectively. As mentioned above, the presumed mechanism of this rate-limiting step is hydride transfer from PEA to LFN, which means that negative charge is transferred from PEA to LFN. Therefore, an increase in the amount of charge transferred reflects an enhancement of the reaction due to the presence of the electrostatic environment. As evident with the energy barrier and in agreement with the experimental data, this increase in charge transfer when the electrostatic environment is included is more pronounced in the isoenzyme MAO B than in isoenzyme MAO A (by about 0.03 charge units).

Consistent with the increased charge transfer, the difference in dipole moments of TS and R of the reacting moiety also increases upon inclusion of the electrostatic environment in both isoenzymes. Again, this increase is more pronounced in the MAO B isoenzyme compared to the MAO A isoenzyme by about 0.4 D.

Next, we considered the HOMO-LUMO gap between the two frontier molecular orbitals relevant to this reaction, i.e., the HOMO of PEA and the LUMO of LFN. A narrower HOMO-LUMO gap indicates higher reactivity between the two molecules. Again, the inclusion of the electrostatic environment (charges turned ON) in both isoenzymes causes the HOMO-LUMO gap to become narrower when going from R to TS. And in line with other parameters, this gap-narrowing effect is more pronounced (by about 23 %) in the MAO B isoenzyme.

**S4. A more detailed version of Table 1.** The experimental enzymatic free energy barrier is given for both isoenzymes. In addition, the calculated energy barriers for both enzymes and both states (charges ON and OFF) are given, as well as their differences (i.e., the barrier lowering effect of the enzymatic environment). For the charge transfer, dipole moment and HOMO-LUMO gap, the calculated values are given for both R and TS with charges turned ON or OFF in both enzymes (all values are averaged over 100 snapshots).

|                                         | MAO A        |        |        |        | MAO B        |        |        |        |
|-----------------------------------------|--------------|--------|--------|--------|--------------|--------|--------|--------|
|                                         | ON           |        | OFF    |        | ON           |        | OFF    |        |
|                                         | R            | TS     | R      | TS     | R            | TS     | R      | TS     |
| $\Delta G_{exp}^\ddagger$<br>[kcal/mol] | <b>18.57</b> |        |        |        | <b>17.29</b> |        |        |        |
| energy barrier<br>[kcal/mol]            | 26.09        |        | 40.31  |        | 19.71        |        | 37.25  |        |
|                                         | <b>14.22</b> |        |        |        | <b>17.54</b> |        |        |        |
| charge transfer<br>[a. u.]              | 0.0132       | 0.5617 | 0.0076 | 0.4001 | 0.0206       | 0.6109 | 0.0130 | 0.4191 |
|                                         | 0.549        |        | 0.393  |        | 0.5903       |        | 0.4062 |        |
|                                         | <b>0.156</b> |        |        |        | <b>0.184</b> |        |        |        |
| dipole moment<br>[D]                    | 14.34        | 15.90  | 10.62  | 11.34  | 13.04        | 14.88  | 10.35  | 10.98  |
|                                         | 1.56         |        | 0.72   |        | 1.84         |        | 0.63   |        |
|                                         | <b>0.84</b>  |        |        |        | <b>1.21</b>  |        |        |        |
| HOMO-LUMO gap<br>[a. u.]                | 0.2037       | 0.1399 | 0.2147 | 0.1731 | 0.1988       | 0.1293 | 0.2152 | 0.1723 |
|                                         | 0.0638       |        | 0.0416 |        | 0.0695       |        | 0.0429 |        |
|                                         | <b>0.022</b> |        |        |        | <b>0.027</b> |        |        |        |

**S5. Alignment of primary sequences of MAO A and MAO B isoenzymes.** Amino acid residues marked in blue font color are positively charged, while residues marked in red are negatively charged. Green squares represent residue pairs where the MAO A residue is more catalytic, while orange squares mean the opposite. A lighter color denotes that  $|\Delta\Delta G_{elec}^{\ddagger}(x)| > 0.05$ , while a stronger color means that  $|\Delta\Delta G_{elec}^{\ddagger}(x)| > 0.1$ .

```

MAOA  --HMFdVvVvIGGGISGLSAAKLLTEYGVSVLVLEARDRVGGRTYTIIRNEHVdYVDVGGAY
MAOB  MSNKCDVvVvVGGGISGMAAAKLLHDSGLNVVvVLEARDRVGGRTYTLRNQKVKYVDLGGSY

MAOA  VGPTQNRILRLSKELGIETYKVNVSERLVQYVKGKTYPFRGAFPPVWNPIAYLDYNNLWR
MAOB  VGPTQNRILRLAKELGLIETYKVNVEVERLIHHVKGKSYPFRGPFPPVWNPIYLDHNNFWR

MAOA  TIDNMGKEIPTDAPWEAQHADKWDKMTMKELIDKICWTKTARRFAYLFVNINVTSEPHIV
MAOB  TMDDMGREIPSDAPWKAPLAEEDNMTMKELLDKLCWTESAKQLATLFVNLCVTAETHIV

MAOA  SALWFLWYVKQCGGTRIFSVTNGGQERKFVGGSGQVSEERIMDLLGDQVKNLHPVTHVDQ
MAOB  SALWFLWYVKQCGGTRIIISTTNGGQERKFVGGSGQVSEERIMDLLGDRVKLERPVIYIDQ

MAOA  SSDNII IETLNHEHYECKYVINAI PPTLTAKIHFPELPAERNQLIQRLPMGAVIKCMMY
MAOB  TRENVLVETLNHEMYEAKYVISAI PPTLGMKIHFNPPLPMMRNQMITRVPLGsvIKCIVY

MAOA  YKEAFWKKKDYCGCMIIEDEDAPISITLDDTKPDGSLPAIMGFILARKADRLAKLHKEIR
MAOB  YKEPFWRKKDYCGTMIIDGEEAPVAYTLDDTKPEGNYAAIMGFILAHKARKLARLTKEER

MAOA  KKKICELYAKVLGSQEALHPVHYEEKNWC EEQYSGGCYTAYFPPGIMTQYGRVIRQPVGR
MAOB  LKKLCELYAKVLGSLEALEPVHYEEKNWC EEQYSGGCYTTYFPPGILTQYGRVLRQPVDR

MAOA  IFFAGTETATKWSGYMEGAV EAGERAREVLNGLGKVTEKDIWVQEPESKDVPVEITHT
MAOB  IYFAGTETATHWSGYMEGAV EAGERAREILHAMGKIPEDEIWQSEPESDVPAQPITTT

MAOA  FWERNLPSVSGLLKIIIGFSTSV--TALGFVLYKYKLL---
MAOB  FLERHLPSVPGLLRLLIGLTTIFSATALGF LAHKRGLLVRV

```

**S6. Difference in contributions to the barrier change  $\Delta G_{elec}^{\ddagger}(x)$  (based on the interaction between the dipole moment of the reacting moiety and the electric field exerted by the enzymatic environment) between MAO A and MAO B, as a function of the average distance from the reacting moiety.** Note that a negative value indicates that the MAO B residue is more catalytic of the two, while for the positive value the opposite is true. Red crosses mark residue pairs where at least one of the two residues is charged, while violet crosses mark pairs where both residues are neutral.

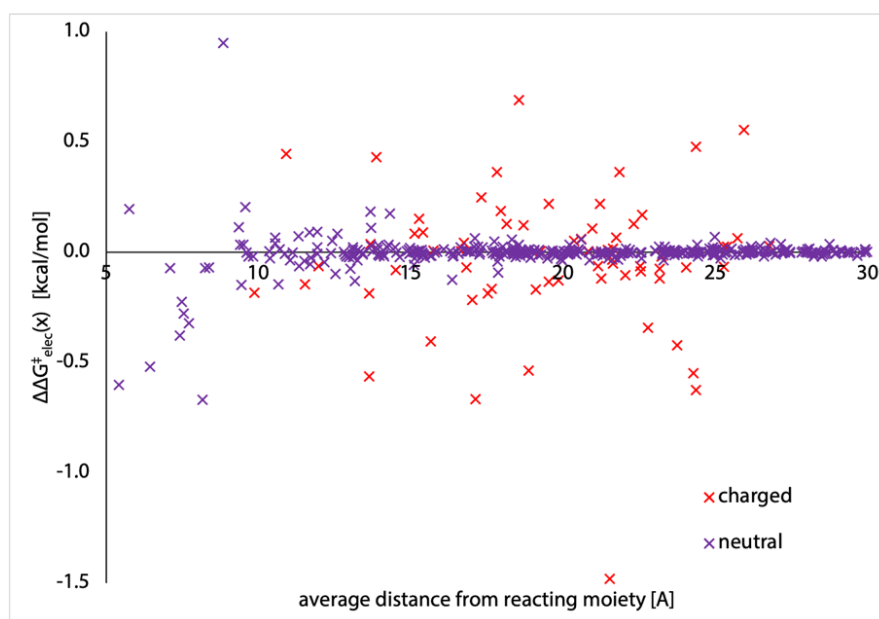

**S7. List of all MAO A and MAO B residue pairs with corresponding calculated  $\Delta G_{elec}^\ddagger(x)$  values.** The name and residue number of all residues is given, as well as the average distance of the residue from the reacting moiety and its individual  $\Delta G_{elec}^\ddagger(x)$  contribution, based on the interaction between the electric field of the enzymatic environment and the dipole moment of the reacting moiety. A negative value of  $\Delta G_{elec}^\ddagger(x)$  denotes the lowering of the barrier (a catalytic effect of the residue), while the opposite is true for a positive value of  $\Delta G_{elec}^\ddagger(x)$ . Finally, the difference in  $\Delta G_{elec}^\ddagger(x)$  i.e.,  $\Delta\Delta G_{elec}^\ddagger(x)$  between the isoenzymes is calculated. A negative value in this case means that the MAO B residue provides a more significant lowering of the barrier than the corresponding MAO A residue and vice versa for the positive value. Entries are sorted by  $\Delta\Delta G_{elec}^\ddagger(x)$ . The red lines are drawn at  $\pm 0.1$  kcal/mol.

| res name<br>MAO A | res ID<br>MAO A | dist.<br>MAO A<br>[Å] | $\Delta G_{elec}^\ddagger(x)$<br>MAO A<br>[kcal/mol] | res name<br>MAO B | res ID<br>MAO B | dist.<br>MAO B<br>[Å] | $\Delta G_{elec}^\ddagger(x)$<br>MAO B<br>[kcal/mol] | $\Delta\Delta G_{elec}^\ddagger(x)$<br>[kcal/mol] |
|-------------------|-----------------|-----------------------|------------------------------------------------------|-------------------|-----------------|-----------------------|------------------------------------------------------|---------------------------------------------------|
| ASN               | 181             | 8.64                  | -1.51                                                | CYS               | 172             | 9.06                  | -0.57                                                | 0.95                                              |
| ASP               | 359             | 19.24                 | -0.11                                                | ARG               | 350             | 17.88                 | 0.58                                                 | 0.69                                              |
| ASN               | 241             | 26.29                 | -0.02                                                | GLU               | 232             | 25.60                 | 0.54                                                 | 0.55                                              |
| ASH               | 343             | 24.43                 | -0.01                                                | GLU               | 334             | 24.32                 | 0.47                                                 | 0.48                                              |
| ASP               | 64              | 11.15                 | 2.93                                                 | ASP               | 55              | 10.66                 | 3.37                                                 | 0.44                                              |
| ASP               | 339             | 14.25                 | 1.42                                                 | ASP               | 330             | 13.49                 | 1.85                                                 | 0.43                                              |
| GLU               | 399             | 18.17                 | 0.32                                                 | GLU               | 390             | 17.49                 | 0.68                                                 | 0.36                                              |
| LYS               | 370             | 22.25                 | -0.39                                                | LEU               | 361             | 21.47                 | -0.02                                                | 0.36                                              |
| ARG               | 76              | 17.95                 | -0.03                                                | ARG               | 67              | 16.66                 | 0.21                                                 | 0.25                                              |
| GLU               | 329             | 20.19                 | -0.80                                                | GLU               | 320             | 22.22                 | -0.58                                                | 0.22                                              |
| GLU               | 228             | 19.95                 | 1.06                                                 | GLU               | 219             | 19.13                 | 1.28                                                 | 0.22                                              |
| MET               | 350             | 9.43                  | -0.35                                                | MET               | 341             | 9.70                  | -0.15                                                | 0.20                                              |
| GLY               | 67              | 5.90                  | -2.13                                                | GLY               | 58              | 5.60                  | -1.94                                                | 0.20                                              |
| GLU               | 185             | 17.91                 | -0.86                                                | GLU               | 176             | 18.00                 | -0.68                                                | 0.18                                              |
| TYR               | 53              | 13.72                 | -0.05                                                | TYR               | 44              | 13.63                 | 0.14                                                 | 0.18                                              |
| CYS               | 323             | 14.19                 | -0.03                                                | THR               | 314             | 14.45                 | 0.14                                                 | 0.17                                              |
| ASP               | 46              | 22.89                 | 0.71                                                 | ASP               | 37              | 22.33                 | 0.88                                                 | 0.17                                              |
| GLU               | 400             | 15.30                 | 1.20                                                 | GLU               | 391             | 15.25                 | 1.35                                                 | 0.15                                              |
| LYN               | 372             | 22.34                 | -0.03                                                | LYS               | 363             | 22.29                 | 0.10                                                 | 0.13                                              |
| LYS               | 90              | 18.35                 | -0.05                                                | LYS               | 81              | 17.93                 | 0.08                                                 | 0.13                                              |
| LYS               | 199             | 18.76                 | 0.73                                                 | LYS               | 190             | 18.62                 | 0.85                                                 | 0.12                                              |
| THR               | 183             | 9.47                  | 0.21                                                 | THR               | 174             | 9.26                  | 0.32                                                 | 0.11                                              |
| ALA               | 409             | 13.40                 | -0.13                                                | THR               | 400             | 14.01                 | -0.02                                                | 0.11                                              |
| GLU               | 43              | 21.12                 | 0.86                                                 | GLU               | 34              | 20.80                 | 0.97                                                 | 0.11                                              |
| VAL               | 65              | 11.58                 | -0.06                                                | LEU               | 56              | 12.27                 | 0.03                                                 | 0.09                                              |
| GLN               | 74              | 11.81                 | 0.43                                                 | GLN               | 65              | 11.56                 | 0.52                                                 | 0.09                                              |
| ARG               | 206             | 15.27                 | 0.77                                                 | ARG               | 197             | 15.54                 | 0.85                                                 | 0.09                                              |
| ARG               | 217             | 15.28                 | -0.22                                                | ARG               | 208             | 14.95                 | -0.13                                                | 0.08                                              |
| THR               | 336             | 12.19                 | -0.34                                                | THR               | 327             | 12.99                 | -0.26                                                | 0.08                                              |
| SER               | 223             | 11.76                 | -0.20                                                | SER               | 214             | 10.86                 | -0.13                                                | 0.07                                              |
| HID               | 488             | 24.01                 | -0.04                                                | THR               | 479             | 25.96                 | 0.03                                                 | 0.07                                              |
| LYS               | 316             | 21.46                 | -0.31                                                | ARG               | 307             | 22.03                 | -0.24                                                | 0.07                                              |
| GLY               | 351             | 10.66                 | 0.24                                                 | GLY               | 342             | 10.45                 | 0.31                                                 | 0.07                                              |
| TYR               | 62              | 17.04                 | -0.09                                                | TYR               | 53              | 17.16                 | -0.03                                                | 0.06                                              |
| ASP               | 232             | 25.92                 | 0.49                                                 | ASP               | 223             | 25.55                 | 0.55                                                 | 0.06                                              |
| GLU               | 453             | 20.71                 | 0.27                                                 | GLU               | 444             | 20.49                 | 0.33                                                 | 0.06                                              |
| THR               | 340             | 18.53                 | -0.02                                                | THR               | 331             | 18.08                 | 0.04                                                 | 0.06                                              |
| GLN               | 99              | 20.13                 | 0.00                                                 | HIE               | 90              | 21.08                 | 0.06                                                 | 0.06                                              |
| GLY               | 301             | 12.74                 | 0.18                                                 | GLY               | 292             | 12.09                 | 0.23                                                 | 0.05                                              |
| GLU               | 87              | 20.76                 | 0.53                                                 | GLU               | 78              | 19.96                 | 0.58                                                 | 0.05                                              |
| ASN               | 212             | 17.88                 | -0.08                                                | ASN               | 203             | 17.60                 | -0.03                                                | 0.05                                              |
| GLU               | 393             | 16.70                 | 0.99                                                 | GLU               | 384             | 16.80                 | 1.03                                                 | 0.04                                              |
| ASH               | 162             | 26.32                 | 0.00                                                 | ASH               | 153             | 27.30                 | 0.04                                                 | 0.04                                              |
| LEU               | 354             | 10.49                 | 0.14                                                 | LEU               | 345             | 10.61                 | 0.18                                                 | 0.04                                              |
| GLH               | 492             | 26.54                 | -0.04                                                | GLH               | 483             | 27.78                 | 0.00                                                 | 0.04                                              |
| GLU               | 436             | 13.69                 | -0.05                                                | GLU               | 427             | 13.65                 | -0.01                                                | 0.04                                              |
| GLN               | 418             | 28.88                 | 0.00                                                 | GLN               | 409             | 28.61                 | 0.03                                                 | 0.04                                              |
| VAL               | 303             | 9.77                  | 0.06                                                 | VAL               | 294             | 9.02                  | 0.10                                                 | 0.03                                              |
| VAL               | 48              | 18.61                 | 0.01                                                 | VAL               | 39              | 18.48                 | 0.05                                                 | 0.03                                              |
| THR               | 408             | 9.55                  | -0.08                                                | THR               | 399             | 9.46                  | -0.05                                                | 0.03                                              |
| GLN               | 474             | 24.80                 | 0.00                                                 | SER               | 465             | 24.01                 | 0.03                                                 | 0.03                                              |
| GLN               | 401             | 20.27                 | -0.03                                                | GLN               | 392             | 20.15                 | 0.00                                                 | 0.03                                              |
| ILE               | 333             | 14.37                 | 0.01                                                 | VAL               | 324             | 14.19                 | 0.04                                                 | 0.03                                              |
| GLY               | 49              | 13.91                 | 0.12                                                 | GLY               | 40              | 13.94                 | 0.15                                                 | 0.03                                              |
| THR               | 417             | 26.86                 | 0.00                                                 | THR               | 408             | 26.09                 | 0.03                                                 | 0.03                                              |
| PHE               | 177             | 13.54                 | -0.36                                                | PHE               | 168             | 13.85                 | -0.33                                                | 0.03                                              |
| GLU               | 458             | 26.81                 | -0.02                                                | GLH               | 449             | 26.74                 | 0.00                                                 | 0.03                                              |
| SER               | 345             | 23.53                 | 0.02                                                 | ASN               | 336             | 23.16                 | 0.05                                                 | 0.03                                              |
| ARG               | 457             | 25.61                 | -0.13                                                | ARG               | 448             | 25.16                 | -0.10                                                | 0.03                                              |
| GLU               | 367             | 25.36                 | 0.29                                                 | GLU               | 358             | 25.19                 | 0.31                                                 | 0.03                                              |
| SER               | 81              | 17.36                 | -0.05                                                | ALA               | 72              | 17.07                 | -0.03                                                | 0.02                                              |
| LEU               | 294             | 23.02                 | -0.01                                                | MET               | 285             | 23.28                 | 0.01                                                 | 0.02                                              |
| THR               | 211             | 17.17                 | -0.05                                                | THR               | 202             | 17.00                 | -0.03                                                | 0.02                                              |
| ASN               | 92              | 18.26                 | -0.05                                                | ASN               | 83              | 17.77                 | -0.03                                                | 0.02                                              |
| ASN               | 125             | 26.09                 | -0.03                                                | ASN               | 116             | 26.25                 | -0.01                                                | 0.02                                              |
| THR               | 105             | 24.51                 | 0.01                                                 | SER               | 96              | 25.32                 | 0.03                                                 | 0.02                                              |
| GLY               | 447             | 11.98                 | 0.03                                                 | GLY               | 438             | 11.88                 | 0.06                                                 | 0.02                                              |
| GLY               | 50              | 13.08                 | 0.09                                                 | GLY               | 41              | 13.13                 | 0.12                                                 | 0.02                                              |
| VAL               | 178             | 14.34                 | -0.33                                                | VAL               | 169             | 14.64                 | -0.31                                                | 0.02                                              |
| ALA               | 355             | 14.45                 | 0.08                                                 | ALA               | 346             | 14.02                 | 0.10                                                 | 0.02                                              |
| PRO               | 186             | 18.11                 | 0.01                                                 | THR               | 177             | 18.61                 | 0.03                                                 | 0.02                                              |
| GLN               | 147             | 31.55                 | -0.01                                                | PRO               | 138             | 30.32                 | 0.01                                                 | 0.02                                              |
| THR               | 204             | 16.37                 | -0.11                                                | THR               | 195             | 16.90                 | -0.09                                                | 0.02                                              |
| ASN               | 75              | 17.55                 | 0.05                                                 | ASN               | 66              | 17.15                 | 0.07                                                 | 0.02                                              |
| ASN               | 396             | 15.22                 | 0.06                                                 | ASN               | 387             | 14.73                 | 0.08                                                 | 0.02                                              |
| ASN               | 133             | 25.44                 | 0.00                                                 | ASH               | 124             | 25.62                 | 0.02                                                 | 0.02                                              |
| ARG               | 454             | 21.83                 | 0.04                                                 | ARG               | 445             | 21.46                 | 0.05                                                 | 0.02                                              |
| HID               | 388             | 28.02                 | -0.01                                                | GLH               | 379             | 28.15                 | 0.00                                                 | 0.02                                              |
| GLH               | 375             | 24.71                 | -0.02                                                | GLH               | 366             | 25.42                 | 0.00                                                 | 0.02                                              |
| LYN               | 136             | 24.77                 | 0.01                                                 | ARN               | 127             | 24.84                 | 0.02                                                 | 0.02                                              |
| ASN               | 57              | 22.08                 | -0.01                                                | ASN               | 48              | 22.05                 | 0.01                                                 | 0.01                                              |
| PRO               | 347             | 20.74                 | 0.00                                                 | ALA               | 338             | 20.30                 | 0.01                                                 | 0.01                                              |
| GLN               | 200             | 13.90                 | 0.34                                                 | GLN               | 191             | 13.92                 | 0.35                                                 | 0.01                                              |
| VAL               | 473             | 25.26                 | -0.01                                                | GLN               | 464             | 25.23                 | 0.01                                                 | 0.01                                              |
| SER               | 38              | 33.04                 | -0.01                                                | ASN               | 29              | 33.82                 | 0.00                                                 | 0.01                                              |
| LYN               | 151             | 30.39                 | 0.00                                                 | GLH               | 142             | 30.10                 | 0.01                                                 | 0.01                                              |
| TRP               | 397             | 10.78                 | 0.01                                                 | TRP               | 388             | 10.61                 | 0.03                                                 | 0.01                                              |
| TYR               | 89              | 16.33                 | 0.11                                                 | TYR               | 80              | 15.85                 | 0.13                                                 | 0.01                                              |
| GLY               | 21              | 18.75                 | 0.02                                                 | GLY               | 12              | 18.12                 | 0.03                                                 | 0.01                                              |
| LEU               | 298             | 18.53                 | 0.03                                                 | VAL               | 289             | 19.24                 | 0.05                                                 | 0.01                                              |
| GLY               | 414             | 25.73                 | 0.01                                                 | GLY               | 405             | 25.28                 | 0.02                                                 | 0.01                                              |
| TYR               | 106             | 25.50                 | -0.02                                                | TYR               | 97              | 26.47                 | -0.01                                                | 0.01                                              |
| GLH               | 290             | 29.80                 | -0.01                                                | MET               | 281             | 30.03                 | 0.00                                                 | 0.01                                              |
| TRP               | 166             | 32.33                 | 0.00                                                 | TRP               | 157             | 32.61                 | 0.01                                                 | 0.01                                              |
| ARN               | 493             | 29.79                 | 0.00                                                 | ARN               | 484             | 30.58                 | 0.01                                                 | 0.01                                              |
| ASH               | 123             | 27.61                 | -0.03                                                | ASH               | 114             | 28.44                 | -0.02                                                | 0.01                                              |
| GLH               | 262             | 33.98                 | -0.01                                                | GLH               | 253             | 33.41                 | 0.00                                                 | 0.01                                              |
| ASN               | 126             | 27.04                 | -0.04                                                | ASN               | 117             | 27.70                 | -0.03                                                | 0.01                                              |
| CYS               | 165             | 26.11                 | -0.01                                                | CYS               | 156             | 26.30                 | 0.00                                                 | 0.01                                              |
| LEU               | 78              | 15.55                 | 0.05                                                 | LEU               | 69              | 15.18                 | 0.06                                                 | 0.01                                              |
| LEU               | 277             | 19.34                 | -0.01                                                | LEU               | 268             | 19.08                 | 0.00                                                 | 0.01                                              |
| VAL               | 220             | 18.83                 | 0.04                                                 | VAL               | 211             | 17.90                 | 0.05                                                 | 0.01                                              |
| TYR               | 124             | 22.67                 | -0.07                                                | HIE               | 115             | 24.66                 | -0.06                                                | 0.01                                              |
| LEU               | 361             | 18.60                 | 0.02                                                 | LEU               | 352             | 19.17                 | 0.03                                                 | 0.01                                              |
| ASP               | 480             | 21.78                 | 0.34                                                 | ASP               | 471             | 21.14                 | 0.35                                                 | 0.01                                              |
| GLY               | 213             | 13.19                 | 0.19                                                 | GLY               | 204             | 13.00                 | 0.20                                                 | 0.01                                              |
| ILE               | 353             | 12.91                 | 0.03                                                 | ILE               | 344             | 13.61                 | 0.04                                                 | 0.01                                              |
| LYN               | 318             | 26.84                 | -0.01                                                | LYN               | 309             | 27.77                 | 0.00                                                 | 0.01                                              |
| ALA               | 358             | 15.07                 | 0.06                                                 | ALA               | 349             | 14.78                 | 0.07                                                 | 0.01                                              |
| THR               | 278             | 21.76                 | 0.01                                                 | GLY               | 269             | 22.61                 | 0.02                                                 | 0.01                                              |
| PHE               | 173             | 18.02                 | -0.11                                                | LEU               | 164             | 19.20                 | -0.10                                                | 0.01                                              |
| SER               | 497             | 31.50                 | 0.02                                                 | SER               | 488             | 32.49                 | 0.03                                                 | 0.01                                              |
| ASH               | 150             | 30.00                 | -0.02                                                | GLH               | 141             | 30.42                 | -0.01                                                | 0.01                                              |
| MET               | 157             | 18.91                 | 0.06                                                 | MET               | 148             | 19.21                 | 0.07                                                 | 0.01                                              |
| GLN               | 237             | 29.98                 | -0.01                                                | ARN               | 228             | 29.86                 | 0.00                                                 | 0.01                                              |
| THR               | 130             | 24.80                 | 0.02                                                 | THR               | 121             | 25.01                 | 0.03                                                 | 0.01                                              |
| GLN               | 293             | 28.32                 | -0.02                                                | GLN               | 284             | 29.43                 | -0.01                                                | 0.01                                              |
| TRP               | 472             | 24.41                 | 0.01                                                 | TRP               | 463             | 24.00                 | 0.01                                                 | 0.01                                              |
| THR               | 489             | 28.07                 | -0.03                                                | THR               | 480             | 29.14                 | -0.02                                                | 0.01                                              |
| ASN               | 292             | 28.48                 | 0.00                                                 | ASN               | 283             | 29.80                 | 0.01                                                 | 0.01                                              |
| PRO               | 413             | 23.78                 | 0.02                                                 | PRO               | 404             | 23.22                 | 0.02                                                 | 0.01                                              |
| ILE               | 423             | 20.34                 | 0.03                                                 | LEU               | 414             | 20.04                 | 0.04                                                 | 0.01                                              |
| GLN               | 384             | 29.27                 | 0.00                                                 | LEU               | 375             | 30.88                 | 0.01                                                 | 0.01                                              |
| TRP               | 128             | 19.44                 | -0.02                                                | TRP               | 119             | 19.89                 | -0.01                                                | 0.01                                              |
| LYN               | 239             | 29.02                 | 0.01                                                 | LYN               | 230             | 28.69                 | 0.01                                                 | 0.01                                              |
| PRO               | 299             | 17.83                 | -0.08                                                | PRO               | 290             | 17.50                 | -0.07                                                | 0.01                                              |
| THR               | 156             | 23.06                 | 0.02                                                 | THR               | 147             | 22.97                 | 0.03                                                 | 0.01                                              |
| PRO               | 412             | 20.64                 | -0.01                                                | PRO               | 403             | 20.35                 | 0.00                                                 | 0.01                                              |
| LEU               | 463             | 34.43                 | 0.00                                                 | MET               | 454             | 34.36                 | 0.00                                                 | 0.01                                              |
| ALA               | 120             | 28.75                 | -0.02                                                | THR               | 111             | 29.48                 | -0.01                                                | 0.01                                              |
| LYN               | 371             | 25.94                 | -0.01                                                | LYN               | 362             | 26.32                 | 0.00                                                 | 0.01                                              |
| TRP               | 152             | 25.92                 | -0.03                                                | TRP               | 143             | 25.91                 | -0.02                                                | 0.01                                              |





| res name MAO A | res ID MAO A | dist. MAO A [Å] | $\Delta G^{\ddagger}_{elec}(k)$ MAO A [kcal/mol] | res name MAO B | res ID MAO B | dist. MAO B [Å] | $\Delta G^{\ddagger}_{elec}(k)$ MAO B [kcal/mol] | $\Delta\Delta G^{\ddagger}_{elec}(k)$ [kcal/mol] |
|----------------|--------------|-----------------|--------------------------------------------------|----------------|--------------|-----------------|--------------------------------------------------|--------------------------------------------------|
| ASH            | 141          | 22.79           | 0.01                                             | ASP            | 132          | 22.79           | -0.34                                            | -0.34                                            |
| ALA            | 68           | 7.42            | -1.01                                            | SER            | 59           | 7.40            | -1.38                                            | -0.38                                            |
| LYS            | 440          | 16.00           | 0.58                                             | HIE            | 431          | 15.32           | 0.18                                             | -0.40                                            |
| ASH            | 330          | 23.47           | 0.03                                             | GLU            | 321          | 24.01           | -0.39                                            | -0.42                                            |
| TYR            | 444          | 6.51            | -1.46                                            | TYR            | 435          | 6.36            | -1.98                                            | -0.52                                            |
| ARG            | 356          | 19.46           | 0.55                                             | HIE            | 347          | 18.30           | 0.01                                             | -0.54                                            |
| HIE            | 59           | 24.19           | -0.01                                            | LYS            | 50           | 24.39           | -0.56                                            | -0.55                                            |
| LYS            | 395          | 14.05           | -1.10                                            | LYS            | 386          | 13.21           | -1.66                                            | -0.56                                            |
| TYR            | 407          | 5.41            | -1.55                                            | TYR            | 398          | 5.44            | -2.15                                            | -0.60                                            |
| ASH            | 153          | 24.34           | 0.00                                             | ASP            | 144          | 24.38           | -0.62                                            | -0.63                                            |
| VAL            | 93           | 16.96           | -0.01                                            | GLU            | 84           | 17.27           | -0.67                                            | -0.67                                            |
| GLN            | 215          | 8.27            | -0.55                                            | GLN            | 206          | 8.04            | -1.22                                            | -0.67                                            |
| ASP            | 61           | 21.26           | 0.80                                             | LYS            | 52           | 21.79           | -0.68                                            | -1.48                                            |



## References

1. Prah, A.; Frančišković, E.; Mavri, J.; Stare, J., Electrostatics as the Driving Force Behind the Catalytic Function of the Monoamine Oxidase A Enzyme Confirmed by Quantum Computations. *ACS Catal.* **2019**, *9* (2), 1231-1240.
2. Oanca, G.; Purg, M.; Mavri, J.; Shih, J. C.; Stare, J., Insights into enzyme point mutation effect by molecular simulation: phenylethylamine oxidation catalyzed by monoamine oxidase A. *PCCP* **2016**, *18* (19), 13346-13356.
3. Pregeljč, D.; Jug, U.; Mavri, J.; Stare, J., Why does the Y326I mutant of monoamine oxidase B decompose an endogenous amphetamine at a slower rate than the wild type enzyme? Reaction step elucidated by multiscale molecular simulations. *PCCP* **2018**, *20* (6), 4181-4188.
4. Vianello, R.; Repič, M.; Mavri, J., How are biogenic amines metabolized by monoamine oxidases? *Eur. J. Org. Chem.* **2012**, *36* (36), 7057-7065.
5. Jorgensen, W. L.; Maxwell, D. S.; TiradoRives, J., Development and testing of the OPLS all-atom force field on conformational energetics and properties of organic liquids. *J. Am. Chem. Soc.* **1996**, *118* (45), 11225-11236.
6. Kaminski, G. A.; Friesner, R. A.; Tirado-Rives, J.; Jorgensen, W. L., Evaluation and reparametrization of the OPLS-AA force field for proteins via comparison with accurate quantum chemical calculations on peptides. *J. Phys. Chem. B* **2001**, *105* (28), 6474-6487.
7. Robertson, M. J.; Tirado-Rives, J.; Jorgensen, W. L., Improved Peptide and Protein Torsional Energetics with the OPLS-AA Force Field. *J. Chem. Theory Comput.* **2015**, *11* (7), 3499-3509.
8. Zwanzig, R. W., High-Temperature Equation of State by a Perturbation Method. I. Nonpolar Gases. *J. Chem. Phys.* **1954**, *22* (8), 1420-1426.
9. Kollman, P., Free-Energy Calculations - Applications to Chemical and Biochemical Phenomena. *Chem. Rev.* **1993**, *93* (7), 2395-2417.
10. Aqvist, J.; Warshel, A., Simulation of Enzyme-Reactions Using Valence-Bond Force-Fields and Other Hybrid Quantum-Classical Approaches. *Chem. Rev.* **1993**, *93* (7), 2523-2544.
11. Warshel, A.; Levitt, M., Theoretical Studies of Enzymic Reactions - Dielectric, Electrostatic and Steric Stabilization of Carbonium-Ion in Reaction of Lysozyme. *J. Mol. Biol.* **1976**, *103* (2), 227-249.
12. Warshel, A.; Weiss, R. M., An Empirical Valence Bond Approach for Comparing Reactions in Solutions and in Enzymes. *J. Am. Chem. Soc.* **1980**, *102* (20), 6218-6226.
13. Stare, J., Complete sampling of an enzyme reaction pathway: a lesson from gas phase simulations. *RSC Adv.* **2017**, *7* (15), 8740-8754.
14. Marelius, J.; Kolmodin, K.; Feierberg, I.; Aqvist, J., Q: a molecular dynamics program for free energy calculations and empirical valence bond simulations in biomolecular systems. *J. Mol. Graphics Modell.* **1998**, *16* (4-6), 213-225, 261.
15. Geha, R. M.; Rebrin, I.; Chen, K.; Shih, J. C., Substrate and inhibitor specificities for human Monoamine Oxidase A and B are influenced by a single amino acid. *J. Biol. Chem.* **2001**, *276* (13), 9877-9882.
